# Supplementary material
Source: ML conference proceedings conference paper supplement (https://openaccess.thecvf.com/content/cvpr_2016/html/Rahmani_3D_Action_Recognition_2016_CVPR_paper.html)
Supplement: Supplementary file 1 [file Rahmani_3D_Action_Recognition_2016_CVPR_supplemental.pdf]

## 3D Action Recognition from Novel Viewpoints (Supplementary Material)

**Comparison of  $f_{c_6}$  and  $f_{c_7}$  Layer Features**

| Feature   | HPM         |             | HPM+TM      |             |
|-----------|-------------|-------------|-------------|-------------|
|           | N-UCLA      | UWA3DII     | N-UCLA      | UWA3DII     |
| $f_{c_6}$ | 76.9        | 58.5        | 89.6        | 76.4        |
| $f_{c_7}$ | <b>78.1</b> | <b>58.9</b> | <b>92.0</b> | <b>76.9</b> |

**Table 1:** This table compares the recognition accuracies of  $f_{c_6}$  and  $f_{c_7}$  layer features of our proposed CNN model on the two multiview datasets. Although performance is not very sensitive to these two layers, we use the outputs of the  $f_{c_7}$  layer as the frame descriptors in all experiments.

**MSR Action Pair3D Dataset (single view)**

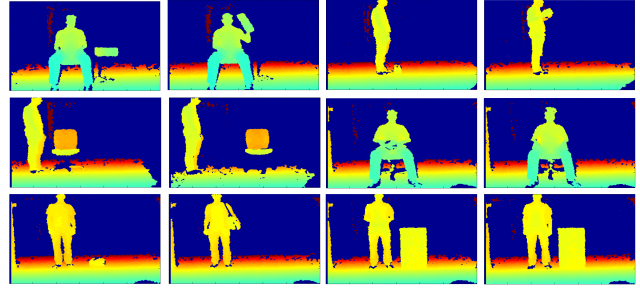

| Method                 | Input data     | Accuracy    |
|------------------------|----------------|-------------|
| Depth Motion Maps [68] | Depth          | 66.1        |
| Actionlet [58]         | Skeleton+Depth | 82.2        |
| HON4D [34]             |                | 96.7        |
| SNV [67]               | Depth          | 98.9        |
| Holistic HOPC [39]     | Depth          | 98.3        |
| Local HOPC [40]        | Depth          | 91.7        |
| Ours (HPM)             | Depth          | 66.1        |
| Ours (HPM+TM)          | Depth          | <b>99.4</b> |

**Figure-Table 2:** Sample depth images from the MSR Action Pairs3D dataset [34] containing 6 pairs of actions performed by 10 subjects. Similarities between the poses of action pairs makes this dataset challenging. We used half of the subjects for training and half for testing similar to [34]. We pass the original unsegmented depth frames through our CNN model to extract their view-invariant features. Results are listed in the table above. As expected our HPM achieves low accuracy because each action pair has similar poses and results in similar descriptors through average pooling. Combining our temporal modeling with HPM dramatically improves the accuracy by 33.3%. Our HPM+TM algorithm outperformed all single-view and cross-view methods. It is important to emphasize that single-view based methods [34,58,67,68] exploit the prior knowledge of fixed view point of training and test videos to achieve high accuracy whereas multiview methods do not tune themselves to such prior knowledge or assumption.

### MSR Daily Activity3D dataset (single view)

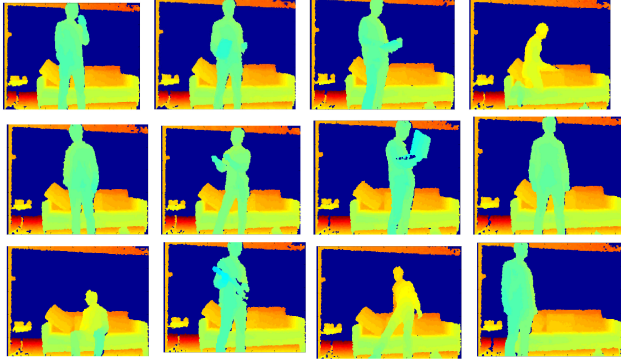

| Method                       | Input data     | Accuracy    |
|------------------------------|----------------|-------------|
| AOG [60]                     | RGB            | 73.1        |
| BHIM [23]                    | RGB+Depth      | 86.9        |
| Interaction Part Mining [74] | RGB+Skeleton   | 89.3        |
| Actionlet [58]               | Skeleton       | 68.0        |
| LARP [54]                    | Skeleton       | 69.4        |
| Actionlet [58]               | Skeleton+Depth | 85.8        |
| HON4D [34]                   | Skeleton+Depth | 80.0        |
| SNV [67]                     | Skeleton+Depth | 86.3        |
| Holistic HOPC [39]           | Skeleton+Depth | 88.8        |
| Actionlet [58]               | Depth          | 42.5        |
| Local HOPC [40]              | Depth          | 78.8        |
| Ours (HPM)                   | Depth          | 68.1        |
| Ours (HPM+TM)                | Depth          | 80.0        |
| Ours (HPM)                   | Skeleton+Depth | <b>95.6</b> |

**Figure-Table 3:** Sample depth images from the MSR Daily Activity3D dataset [58] containing 16 daily activities performed twice by 10 subjects, once in the standing position and once while sitting. Most activities involve human-object interactions which makes this dataset challenging. Recall that we trained our CNN model using synthetic depth images of only human poses. Following [58], we use videos of half of the subjects for training and half for testing. Results are listed in the table above. HPM alone achieves low accuracy however, combining the proposed temporal modeling with HPM significantly improves the accuracy to 80.0% which is higher than the skeleton only and depth only based methods. For a fair comparison with Skeleton+Depth based methods [34,39,58,67], we combine these features and achieve 95.6% accuracy which is over 6% higher than the nearest competitor.

### The MSR Gesture3D dataset (single view)

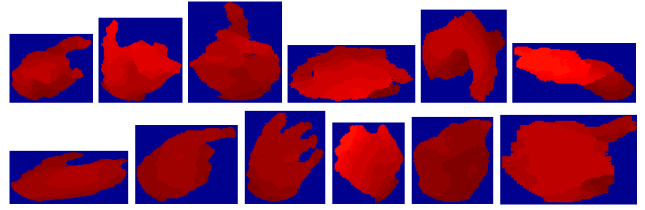

| Method                          | Input data | Accuracy    |
|---------------------------------|------------|-------------|
| Action Graph on Occupancy [26]  | Depth      | 80.5        |
| Action Graph on Silhouette [26] | Depth      | 87.7        |
| Depth Motion Maps [68]          | Depth      | 89.2        |
| ROP [57]                        | Depth      | 88.5        |
| HON4D [34]                      | Depth      | 92.5        |
| SNV [67]                        | Depth      | 94.7        |
| Holistic HOPC [39]              | Depth      | <b>96.2</b> |
| Local HOPC [40]                 | Depth      | 93.6        |
| Ours (HPM)                      | Depth      | 91.0        |
| Ours (HPM+TM)                   | Depth      | 94.7        |

**Figure-Table 4:** Sample depth images from the MSR Gesture3D dataset [26] which contains 12 American sign language gestures performed 2 to 3 times by 10 subjects. We choose this dataset to show that our learned CNN model is able to generalize to hand gestures even though the CNN model was trained on full human body poses. We use the leave-one-subject-out cross validation scheme [26]. Comparative results are listed in the table above. Actionlet [58], LARP [54] and AOG [60] methods cannot operate on this dataset, because 3D joint positions are not present. Even though our model was trained on fully human body poses, it still competes well with existing methods and achieves the second highest accuracy.

## References

Please see the paper for references.
